# Supplementary material for: Social Perception of Public Water Supply Network and Groundwater Quality in an Urban Setting Facing Saltwater Intrusion and Water Shortages
Source: Springer Nature journal article supplement (doi:10.1007/s00267-016-0803-2), 2016-12-21
Supplement: MOESM1 [file 11953730]

Supplementary Material

Summary results from the administered household survey

| *Variable Description* | *Category* | *Response* |
| --- | --- | --- |
| **Buildingcharacteristics** | | |
| Building’s age (N = 176) |  | Mean = 26.7  Range = 2 - 150 |
| Apartment owner or tenant? (N = 176) | Owner  Tenant | 79.4% 20.6% |
| **Socio-economic characteristics** | | |
| Gender | Male Female | 46.9% 53.1% |
| Respondent’s age (N = 168) |  | Mean = 55.4  Range = 21 - 92 |
| Level of education completed (N = 175) | Illiterate  Literate  Elementary school  Middle school  Secondary school  Technical  University  Higher education | 1.7%  7%  5.7%  10.3%  19%  7%  39%  10.3% |
| Monthly income (N = 166) | 500$ or below  500 – 1,500$  1500 – 4,000$  4,000 – 6,000$  More than 6,000$ | 2.4%  23.5%  38.5%  19.9%  15.7% |
| Monthly expenditure (N=155) | 500$ or below  500 – 1,500$  1500 – 4,000$  4,000 – 6,000$  More than 6,000$ | 6%  16.8%  45.8%  10.3% 21.1% |
| **Network water delivery frequency** | | |
| How many times per week do you receive the network water? (N = 132) | 1 to 3 times  4 times  5 to 7 times | 16%  71.2%  12.8% |

| Variable Description | Responses | Mean /% |
| --- | --- | --- |
| Are you satisfied with your well water quality in summer? (N = 171) | 1 = Yes  2 = No | 22.2%  77.8% |
| Are you satisfied with your well water quality in winter? (N = 167) | 1 = Yes  2 = No | 30%  70% |
| How would you rate your well water in general?  (N = 175) | 1 = Good  2 = Average  3 = Bad | 26.9%  46.8%  26.3% |
| Are you satisfied with the water quality of your public water supply network in the summer? (N = 131) | 1 = Yes  2 = No | 40%  60% |
| Are you satisfied with the water quality of your public water supply network in the winter? (N = 135) | 1 = Yes  2 = No | 57%  43% |
| How would you rate your public water supply network in general?  (N = 136) | 1 = Good  2 = Average  3 = Bad | 41.2%  50%  8.8% |
